# Supplementary material for: Combinatorial parallel synthesis and automated screening of a novel class of liquid crystalline materials
Source: Royal Society of Chemistry journal article supplement (doi:10.1039/b207630f), 2002-01-01
Supplement: b207630f.doc [file b207630f.doc]

Electronic supplementary information for article by Deeg, Kirsch, Pauluth and Bäuerle entiteled „Combinatorial Parallel Synthesis and Automated Screening of a Novel Class of Liquid Crystalline Materials”

**Experimental**

General Procedures

Parallel heating of the closed vials in which the reactions were carried out, was achieved by inserting the reaction vessels into a custom made aluminium block, that was put on top of a commercial temperature controlled magnetic stirring hotplate. The setup allows parallel heating and magnetic stirring of up to 35 vials. Parallel shaking was performed with an Advanced ChemTec PLS4x6 shaker. Parallel filtration was performed with a IST VacMaster parallel vacuum manifold and Separtis SPE-filter-syringes.

The phase-transition temperatures were determined by automated sequential DSC with a TA Instruments DSC 29-20 equipped with a TA Instruments DSC autosampler. The mesophases were determined manually by optical polarisation microscopy with a Leitz microscope and a Mettler Hotstage 52/FT 5.

1. Combinatorial parallel synthesis of terphenyls **6**

Each of four vials (45 ml) was charged with 2,3,2'-trifluoro-4'-iodo-4-trimethylsilyl-biphenyl **4** (2.00 mmol) a alkyl-phenylboronic acids **5a**–**d** (2.20 mmol), 250 mg (2.40 mmol) neopentyl glycol, 1.53 g (4.84 mmol) Ba(OH)2•8H20, 1.35 ml (0.103 mmol, 5 mol%) of a 76 mM Pd(OAc)2 solution in acetone and 20 ml degassed 95% *i*PrOH under argon. The closed reaction vessels were heated for 12 h at 80°C with magnetic stirring. Subsequently, the solvent was removed with a stream of nitrogen. To the residue 5 ml 2 M HCl were added and extracted with dichloromethane (3 × 5 ml). The organic phases were purified by parallel-filtration over SPE-cartridges consisting of a glass-fibre filter, silica and celite. In all cases terphenyls **6** were obtained in quantitative yields. GC-control revealed, that the conversion of biphenyl **4** was 100%. The main impurities were the homo-coupling products of boronic acids **5** (as determined by GC-MS).

Table 1: Yield and purity of terphenyls 6

| entry | product | R | conversion of **4**[a] [%] | purity[a] [%] |
| --- | --- | --- | --- | --- |
| 1 | **6a** | propyl | quant. | 89 |
| 2 | **6b** | *t*butyl | quant. | 70 |
| 3 | **6c** | pentyl | quant. | 66 |
| 4 | **6d** | decyl | quant. | 75 |

[a] as determined by GC

2. Parallel iodo-desilylation of terphenyls **6**

The crude terphenyls **6** were dissolved in 4 ml abs. acetonitrile and reacted in parallel in four 10 ml syringes equipped with a PE-frit by adding 1.20 ml (6.00 mmol) of a 5 M solution of ICl in MeCN and shaking for 1 h at RT. The precipitated product **7** was filtered off by application of vacuum and washed 2 M Na2S2O5 (10 ml) and water (10 ml) and dried in vacuo.

Table 2: Yield and purity of terphenyls 7

| entry | product | R | yield[a],[b] [%] | purity[c] [%] |
| --- | --- | --- | --- | --- |
| 1 | **7a** | propyl | 54 | 95 |
| 2 | **7b** | *t*butyl | 58 | 82 |
| 3 | **7c** | pentyl | 49 | 91 |
| 4 | **7d** | decyl | 45 | 95 |

[a] determined by balancing; [b] two steps form biphenyl **4**; [c] determined by GC

3. Combinatorial parallel synthesis of quaterphenyls **8**

Each of 16 vials (7 ml) was charged with a terphenyl **7a**–**d** (0.100 mmol), an alkyl-phenylboronic acid **5a**–**d** (0.120 mmol) and 13.6 mg (0.13 mmol) neopentyl glycol, 95.0 mg (0.301 mmol) Ba(OH)2•8H20, 80 l (6.08 mmol, 5 mol%) of a 76 mM solution of Pd(OAc)2 in acetone and 2 ml degassed 95% *i*PrOH under argon. The closed reaction vessels were heated for 12 h at 80°C with magnetic stirring. Subsequently, the solvent was removed with a stream of nitrogen. To the residue 2 ml 2 M HCl were added and extracted with dichloromethane (3 × 2 ml). The organic phases were purified by parallel-filtration over SPE-cartridges consisting of a glass-fibre filter, silica and celite. The crude products **8** were recrystallised twice from nonane. The phase-transition temperatures were determined by automated sequential DSC with a TA Instruments DSC 29-20 equipped with a TA Instruments DSC autosampler. Mesophases were determined by optical polarisation microscopy with a Leitz microscope and a Mettler Hotstage 52/FT 5.

Table 3: Yield and purity of quaterphenyls 8

|  |  |  |  |  |  | phase-transition | *H*melt |
| --- | --- | --- | --- | --- | --- | --- | --- |
| entry | product | R | R' | yield[a] [%] | purity[b] [%] | temperatures [°C] | [kcal/mol] |
| 1 | **8aa** | propyl | propyl | 61 | > 99 % | K 150 (S? 137) N 267.7 I | 6.8 |
| 2 | **8ab** | propyl | *t*butyl | 76 | > 99 % | K 140 N 153.0 I | 6.6 |
| 3 | **8ac** | propyl | pentyl | 42 | > 99 % | K 103 N 252.5 I | 3.4 |
| 4 | **8ad** | propyl | decyl | 55 | > 99 % | K 103 SC 114 N 205.1 I | 8.5 |
| 5 | **8ba** | *t*butyl | propyl | 30 | > 99 % | K 171 (N 150.8) I | 8.9 |
| 6 | **8bb** | *t*butyl | *t*butyl | 57 | > 99 % | K 177 S? 227.0 I | 5.2 |
| 7 | **8bc** | *t*butyl | pentyl | 54 | > 99 % | K 134 N 144.3 I | 8.7 |
| 8 | **8bd** | *t*butyl | decyl | 55 | > 99 % | K 101 SC 123 N 127.5 I | 7.5 |
| 9 | **8ca** | pentyl | propyl | 53 | > 99 % | K 99 N 250.6 I | 6.1 |
| 10 | **8cb** | pentyl | *t*butyl | 75 | > 99 % | K 133 N 140.8 I | 7.0 |
| 11 | **8cc** | pentyl | pentyl | 56 | > 99 % | K 106 N 234.4 I | 6.1 |
| 12 | **8cd** | pentyl | decyl | 49 | > 99 % | K 102 SC 135 N 197.5 I | 9.1 |
| 13 | **8da** | decyl | propyl | 65 | > 99 % | K 93 N 207.9 I | 6.5 |
| 14 | **8db** | decyl | *t*butyl | 60 | > 99 % | K 115 N 119.3 I | 4.5 |
| 15 | **8dc** | decyl | pentyl | 61 | > 99 % | K 85 S? ? N 198.7 I | 9.0 |
| 16 | **8dd** | decyl | decyl | 73 | > 99 % | K 104 SC 158 N 177.3 I | 12.0 |

[a] determined by balancing; [b] HPLC

NMR-spectroscopic characterisation of selected library-members

**2',3',2''-Trifluoro-4,4'''-dipropyl-[1,4':1',1'':4'',1''']quaterphenyl 8aa**

**1H-NMR** (400.1 MHz, CDCl3):  = 1.007 (t, *J*HH = 7.3 Hz, 3 H), 1.013 (t, *J*HH = 7.3 Hz, 3 H), 1.72 (sex, *J*HH = 7.5 Hz, 2 H), 1.73 (sex, *J*HH = 7.5 Hz, 2 H), 2.67 (t, *J*HH*=* 7.6 Hz, 2 H), 2.68 (t, *J*HH*=* 7.5 Hz, 2 H), 7.23–7.32 (m, 6 H), 7.43–7.58 (m, 7 H).

**13C-NMR** (100.6 MHz, CDCl3):  = 13.84, 13.87, 24.4, 24.5, 37.7, 37.8, 114.2 (d, *J*CF = 23.2 Hz), 120.8 (dd, *J*CF = 15.2 Hz, *J*CF = 2.3 Hz), 122.6 (d, *J*CF = 3.4 Hz), 123.8 (d, *J*CF = 12.5 Hz), 124.5 (t, *J*CF = 3.4 Hz), 125.6 (br. s), 126.9, 128.74, 128.76, 129.1, 130.7 (d, *J*CF = 10.6 Hz), 131.6 (br. s), 131.9, 136.7 (d, *J*CF = 1.9 Hz), 142.9 (d, *J*CF = 12.9 Hz), 143.6 (d, *J*CF = 8.4 Hz), 148.3 (dd, *J*CF = 249.6 Hz, *J*CF = 13.9 Hz), 148.7 (dd, *J*CF = 250.1 Hz, *J*CF = 14.4 Hz), 160.0 (d, *J*CF = 249.4 Hz). The increased intensity at  = 128.8 indicates, that two carbon resonances coincide here.

**MS** (APCI+, CH2Cl2, hexane): *m*/*z* = 445.5 [M+H]+.

**2',3',2''-Trifluoro-4'''-pentyl-4-propyl-[1,4':1',1'':4'',1''']quaterphenyl 8ca**

**1H-NMR** (400.1 MHz, CDCl3):  = 0.92 (t, *J*HH = 6.7 Hz, 3 H), 1.00 (t, *J*HH = 7.3 Hz, 3 H), 1.35–1.38 (m, 4 H), 1.65–1.75 (m, 4 H), 2.65–2.67 (m, 4 H), 7.23–7.31 (m, 6 H), 7.42–7.57 (m, 7 H).

**13C-NMR** (100.6 MHz, CDCl3):  = 13.9, 14.0, 22.5, 24.4, 31.1, 31.5, 35.6, 37.8 114.2 (d, *J*CF = 22.9 Hz), 120.7 (d, *J*CF = 13.8 Hz), 122.6 (d, *J*CF = 2.9 Hz), 123.9 (d, *J*CF = 12.4 Hz), 124.5, 125.6 (br. s), 126.9, 128.8, 129.0, 130.7 (d, *J*CF = 10.5 Hz), 131.6 (br. s), 131.9, 136.7, 143.1 (d, *J*CF = 18.1 Hz), 143.7 (d, *J*CF = 8.1 Hz), 148.4 (dd, *J*CF = 255.6 Hz, *J*CF = 14.8 Hz), 148.7 (dd, *J*CF = 250.6 Hz, *J*CF = 13.6 Hz), 160.1 (d, *J*CF = 248.9 Hz). The increased intensities at  = 128.8 and 129.0 indicate, that two carbon resonances coincide here.

**4-Decyl-2',3',2''-trifluoro-4'''-propyl-[1,4':1',1'':4'',1''']quaterphenyl 8ad**

**1H-NMR** (400.1 MHz, CDCl3):  = 0.90 (t, *J*HH = 6.9 Hz, 3 H), 1.00 (t, *J*HH = 7.3 Hz, 3 H), 1.26–1.40 (m, 14 H), 1.69 (sex, *J*HH = 7.5 Hz, 2 H), 1.71 (sex, *J*HH = 7.5 Hz, 2 H), 2.66 (t, *J*HH*=* 7.5 Hz, 2 H), 2.68 (t, *J*HH*=* 7.5 Hz, 2 H), 7.23–7.32 (m, 6 H), 7.42–7.57 (m, 7 H).

**13C-NMR** (100.6 MHz, CDCl3):  = 13.8, 14.1, 22.7, 24.5, 29.3, 29.4, 29.5, 29.60, 29.63, 31.4, 31.9, 35.7, 37.7, 114.2 (d, *J*CF = 23.2 Hz), 120.8 (dd, *J*CF = 15.6 Hz, *J*CF = 2.3 Hz), 122.6 (d, *J*CF = 3.0 Hz), 123.8 (d, *J*CF = 12.9 Hz), 124.5 (t, *J*CF = 3.4 Hz), 125.6, 126.9, 128.7, 128.8 (d, *J*CF = 3.0 Hz), 129.1, 130.7 (d, *J*CF = 10.6 Hz), 131.6 (br. s), 131.9 (br. s), 136.7 (d, *J*CF = 1.9 Hz), 142.9, 143.3, 143.6 (d, *J*CF = 8.0 Hz), 148.3 (dd, *J*CF = 249.6 Hz, *J*CF = 13.9 Hz), 148.7 (dd, *J*CF = 250.3 Hz, *J*CF = 13.9 Hz), 160.1 (d, *J*CF = 249.0 Hz).

**4,4'''-Bis-decyl-2',3',2''-trifluoro-[1,4':1',1'':4'',1''']quaterphenyl 8dd**

**1H-NMR** (400.1 MHz, CDCl3):  = 0.88–0.92 (m, 6 H), 1.24–1.42 (m, 28 H), 1.64–1.72 (m, 4 H), 2.66–2.70 (m, 4 H), 7.23–7.32 (m, 6 H), 7.42–7.57 (m, 7 H).

**13C-NMR** (100.6 MHz, CDCl3):  = 14.1, 22.7, 29.34, 29.37, 29.39, 29.5, 29.60, 29.64, 31.39, 31.43, 31.9, 35.7, 35.8, 114.2 (d, *J*CF = 23.2 Hz), 120.8 (dd, *J*CF = 15.6 Hz, *J*CF = 2.3 Hz), 122.6 (d, *J*CF = 3.0 Hz), 123.8 (d, *J*CF = 12.5 Hz), 124.5 (t, *J*CF = 3.4 Hz), 125.6, 126.9, 128.7, 128.8 (d, *J*CF = 3.0 Hz), 129.0, 130.7 (d, *J*CF = 10.6 Hz), 131.6 (dd, *J*CF = 3.4 Hz, *J*CF = 2.3 Hz), 131.9 (br. s), 136.7 (d, *J*CF = 1.9 Hz), 143.1, 143.3, 143.7 (d, *J*CF = 8.0 Hz), 148.3 (dd, *J*CF = 249.6 Hz, *J*CF = 13.9 Hz), 148.7 (dd, *J*CF = 250.5 Hz, *J*CF = 14.0 Hz), 160.1 (d, *J*CF = 249.0 Hz). The increased intensities at  = 14.1, 22.7, 29.34, 29.5, 29.60, 29.64, and 31.9 indicate, that two carbon resonances coincide here.
